# Supplementary material for: Pharmacological Profile of MP-101, a Novel Non-racemic Mixture of R- and S-dimiracetam with Increased Potency in Rat Models of Cognition, Depression and Neuropathic Pain
Source: MDPI journal article supplement (doi:10.3390/cells11244027), 2022-12-13
Supplement: s1 [file s1]

# Pharmacological Profile of MP-101, a Novel Non-racemic Mixture of R- and S-dimiracetam with Increased Potency in Rat Models of Cognition, Depression and Neuropathic Pain

Tiziana Bonifacino <sup>1,2,†</sup>, Laura Micheli <sup>3,†</sup>, Carola Torazza <sup>1</sup>, Carla Ghelardini <sup>3</sup>, Carlo Farina <sup>4</sup>,  
Giambattista Bonanno <sup>1,5</sup>, Marco Milanese <sup>1,5,\*</sup>, Lorenzo Di Cesare Mannelli <sup>3,\*</sup> and Michael W. Scherz <sup>4</sup>

<sup>1</sup> Department of Pharmacy (DIFAR), Pharmacology and Toxicology Unit, University of Genoa, 16148 Genoa, Italy

<sup>2</sup> Inter-University Center for the Promotion of the 3Rs Principles in Teaching & Research (Centro 3R), 56122 Pisa, Italy

<sup>3</sup> Department of Neuroscience, Psychology, Drug Research and Child Health, NEUROFARBA-Pharmacology and Toxicology Section, University of Florence, 50139 Florence, Italy

<sup>4</sup> Metys Pharmaceuticals c/o Novaremed AG, 4051 Basel, Switzerland

<sup>5</sup> IRCCS, Ospedale Policlinico San Martino, 16132 Genoa, Italy

\* Correspondence: marco.milanese@unige.it (M.M.); lorenzo.mannelli@unifi.it (L.D.C.M.)

† These authors contributed equally to this work.

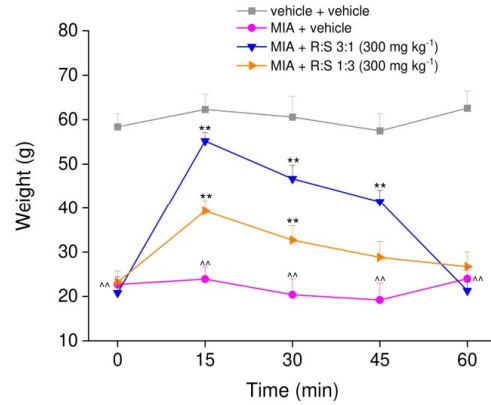

**Supplementary Figure S1.** Evaluation of the effects of R:S 3:1 and R:S 1:3 against MIA-induced mechanical hyperalgesia. Sodium monoiodoacetate (MIA) 2 mg/25  $\mu$ L was injected into the tibio-tarsal joint of rats on day 1. Tested mixtures were administered acutely 14 days after MIA administration at the dose of 300 mg kg<sup>-1</sup> *per os*. Control animals were treated with vehicles. Mechanical hyperalgesia was measured on the ipsilateral paw by the Paw pressure test. Results are expressed as mean  $\pm$  S.E.M. of 8 rats analysed in 4 different experimental sets. Statistical analysis was one-way ANOVA followed by Bonferroni's post hoc comparison. <sup>^</sup>P<0.0 vs vehicle + vehicle treated animals; <sup>\*\*</sup>p<0.01 vs MIA + vehicle treated animals.

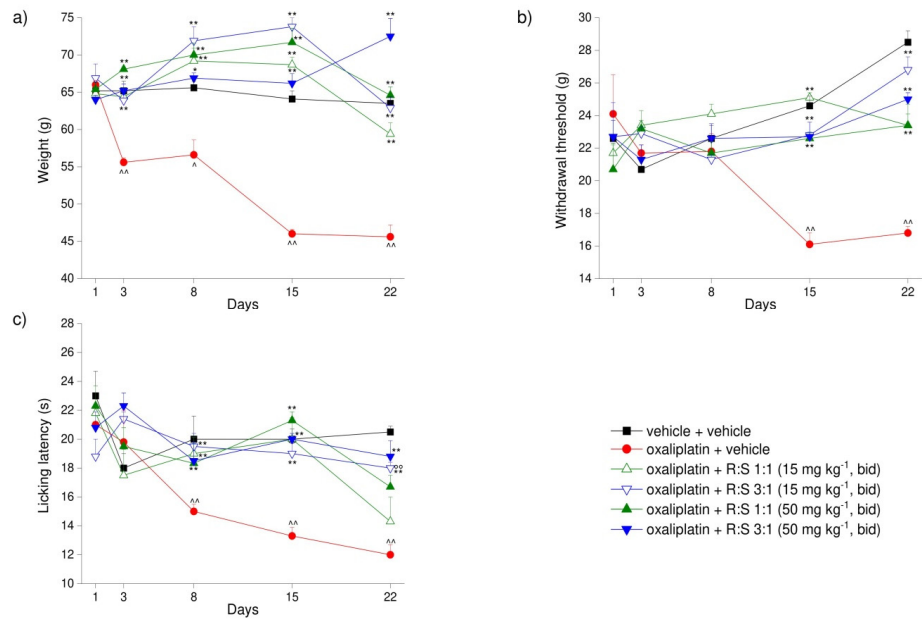

**Supplementary Figure S2.** Evaluation of the acute effects of R:S 1:1 and R:S 3:1 against oxaliplatin-induced neuropathic pain. Oxaliplatin (2.4 mg kg<sup>-1</sup> i.p.) was administered on days 1-15, for a total of 11 injections. R:S 1:1 and R:S 3:1 were dissolved in 1% CMC and were daily *per os* administered from day 1 until day 22 (15 and 50 mg kg<sup>-1</sup> bid, in the morning and in the evening). Control animals were treated with vehicles. In the graphs are represented the behavioral measurements performed 1 h after treatments. The pain relieving effects of R:S 1:1 and R:S 3:1 was assessed by a) Paw pressure test, b) von Frey test and c) Cold plate at the indicated time points. Each value represents the mean  $\pm$  S.E.M. of 6 rats. Statistical analysis was one-way ANOVA followed by Bonferroni's post hoc comparison. <sup>^</sup> p < 0.05; <sup>^^</sup> p < 0.01 vs vehicle + vehicle; \*p<0.05 and \*\*p<0.01 vs oxaliplatin + vehicle; <sup>°°</sup>p<0.01 vs oxaliplatin + R:S 1:1 15 mg kg<sup>-1</sup>.
